# Supplementary material
Source: HighWire-hosted journal article supplement (https://bmjopen.bmj.com/content/15/1/e088924)
Supplement: inline-supplementary-material-2 [file inline-supplementary-material-2.pdf]

## SUPPLEMENTARY MATERIALS

**Table S1.** WHO Trial Registration Data Set

| <b>Data Category</b>                          | <b>Information</b>                                                                                                                                                                                                                      |
|-----------------------------------------------|-----------------------------------------------------------------------------------------------------------------------------------------------------------------------------------------------------------------------------------------|
| Primary registry and trial identifying number | ClinicalTrials.gov NCT06705608                                                                                                                                                                                                          |
| Date of registration in primary registry      | 25 November 2024                                                                                                                                                                                                                        |
| Secondary identifying numbers                 | N/A                                                                                                                                                                                                                                     |
| Source(s) of monetary or materials support    | Canadian Institutes of Health Research                                                                                                                                                                                                  |
| Primary Sponsor                               | Collaboration for Outcomes Research and Evaluation (CORE)                                                                                                                                                                               |
| Secondary sponsor(s)                          | N/A                                                                                                                                                                                                                                     |
| Contact for public queries                    | Jacquelyn J. Cragg, PhD<br>jacquelyn.cragg@icord.org<br>Faculty of Pharmaceutical Sciences<br>University of British Columbia<br>2405 Wesbrook Mall<br>Vancouver, BC V6T 1Z3                                                             |
| Contact for scientific queries                | Jacquelyn J. Cragg, PhD<br>jacquelyn.cragg@icord.org<br>Faculty of Pharmaceutical Sciences<br>University of British Columbia<br>2405 Wesbrook Mall<br>Vancouver, BC V6T 1Z3                                                             |
| Public title                                  | Fingolimod and risk of skin cancer among individuals with multiple sclerosis: a population-based cohort study protocol                                                                                                                  |
| Scientific title                              | Fingolimod and risk of skin cancer among individuals with multiple sclerosis: a population-based cohort study protocol                                                                                                                  |
| Countries of recruitment                      | Canada                                                                                                                                                                                                                                  |
| Health condition(s) or problem(s) studied     | Skin cancer                                                                                                                                                                                                                             |
| Intervention(s)                               | Fingolimod<br>Active comparators: natalizumab, alemtuzumab, dimethyl fumarate, teriflunomide                                                                                                                                            |
| Key inclusion and exclusion criteria          | Inclusion criteria: Multiple sclerosis; age > 18 years; no documented prior receipt of interventions; no skin cancer-related encounters in last 3 years, disease-modifying therapy indication for relapse-remitting multiple sclerosis. |
| Study type                                    | Observational<br>Method of allocation: Randomized assignment is emulated by adjustment for confounding factors to ensure exchangeability of study groups<br>Masking: N/A<br>Assignment: Parallel<br>Purpose: Prevention                 |
| Date of first enrolment                       | 1 January 2003                                                                                                                                                                                                                          |
| Target sample size                            | Population based                                                                                                                                                                                                                        |
| Recruitment status                            | N/A – Administrative health data sources                                                                                                                                                                                                |
| Primary outcome(s)                            | Skin cancer<br>Method of measurement: ICD codes<br>Timepoints: Months from treatment initiation                                                                                                                                         |
| Key secondary outcomes                        | N/A                                                                                                                                                                                                                                     |

**Table S2.** Drug identification number for disease-modifying-therapies

| DMT Agent          | Approved DINs <sup>a</sup>                                                                                                                                     | Off Label DINs                                                                                                                                                                                                                                                                                                       |
|--------------------|----------------------------------------------------------------------------------------------------------------------------------------------------------------|----------------------------------------------------------------------------------------------------------------------------------------------------------------------------------------------------------------------------------------------------------------------------------------------------------------------|
| Azathioprine       |                                                                                                                                                                | 02242907, 00004596, 02236819                                                                                                                                                                                                                                                                                         |
| Cladribine         | 02470179                                                                                                                                                       | 02319918, 02494574                                                                                                                                                                                                                                                                                                   |
| Cyclophosphamide   |                                                                                                                                                                | 02241797, 02241798, 02241799, 02241800, 02241795, 02241796                                                                                                                                                                                                                                                           |
| Methotrexate       |                                                                                                                                                                | 02509067, 02182963, 02524023, 02327236, 02464365, 02474735, 02474891, 02182777, 02182947, 02182955, 02182971, 02422166, 02422174, 02422182, 02422190, 02422204, 02099705, 02491311, 02491338, 02491346, 02491354, 02491362, 02182750, 02454750, 02454769, 02454777, 02454831, 02454858, 02454866, 02454874, 02170698 |
| Mitoxantrone       |                                                                                                                                                                | 02286300                                                                                                                                                                                                                                                                                                             |
| Teriflunomide      | 02416328, 02502933, 02500639, 02504170, 02523833, 02500469, 02500310, 02500434, 02505843, 02501090                                                             |                                                                                                                                                                                                                                                                                                                      |
| Dimethyl Fumarate  | 02404508, 02420201, 02513803, 02513781, 02497034, 02497026, 02502704, 02502690, 02516055, 02516047, 02494817, 02494809, 02505770, 02505762, 02495368, 02495341 |                                                                                                                                                                                                                                                                                                                      |
| Glatiramer Acetate | 02245619, 02456915, 02460661                                                                                                                                   |                                                                                                                                                                                                                                                                                                                      |
| Interferon Beta    | 02169649, 02237319, 02237320, 02269201, 02318253, 02318261, 02444399, 02444402                                                                                 |                                                                                                                                                                                                                                                                                                                      |
| Fingolimod         | 02365480, 02469561, 02469618, 02482606, 02469782, 02469715, 02487772, 02482533, 02469936, 02475669                                                             |                                                                                                                                                                                                                                                                                                                      |
| Natalizumab        | 02286386                                                                                                                                                       |                                                                                                                                                                                                                                                                                                                      |
| Alemtuzumab        | 02418320                                                                                                                                                       | 2290960                                                                                                                                                                                                                                                                                                              |
| Ocrelizumab        | 02467224                                                                                                                                                       |                                                                                                                                                                                                                                                                                                                      |
| Rituximab          |                                                                                                                                                                | 02513447, 02241927, 02457350, 02473976, 02498316, 02495724, 02478382, 02478390                                                                                                                                                                                                                                       |
| Minocycline        |                                                                                                                                                                | 02278219, 02084090, 02084104                                                                                                                                                                                                                                                                                         |

DINs were obtained from the Health Canada Drug Product Database Online Query (<https://health-products.canada.ca/dpd-bdpp/index-eng.jsp> accessed August 4, 2023).

<sup>a</sup>Drugs approved by Health Canada for the treatment of MS.

**Table S3.** Covariates for emulating a target trial of DMT and skin cancer

| Covariate                                    | Categories/Values         |
|----------------------------------------------|---------------------------|
| <b>Time-fixed</b>                            |                           |
| Age at drug initiation                       | 18–99 years old           |
| Age at MS diagnosis                          | 18–99 years old           |
| Year of drug initiation                      | 2003–2020                 |
| Sex                                          | Female; Male              |
| <b>Time-varying</b>                          |                           |
| Month of follow-up                           | 0–204 months              |
| Charlson Comorbidity Index                   | 0–37 points               |
| MS severity (proxy)                          | EDSS<6; EDSS≥6            |
| Smoking status (proxy)                       | Never smoked; Ever smoked |
| Rheumatoid arthritis                         | Yes; No                   |
| Neighborhood income quintile-based residence | 0–20%                     |
|                                              | 20–40%                    |
|                                              | 40–60%                    |
|                                              | 60–80%                    |
|                                              | 80–100%                   |
